## RESEARCH ARTICLE

# COVID-19 mortality sentinel surveillance at a tertiary referral hospital in Lusaka, Zambia, 2020–2021

Jonas Z. Hines<sup>1\*</sup>, Priscilla Kapombe<sup>2</sup>, Adam Mucheleng'anga<sup>3</sup>, Stephen L. Chanda<sup>4</sup>, Amos Hamukale<sup>4</sup>, Mweene Cheelo<sup>2</sup>, Kashala Kamalongo<sup>1</sup>, Leigh Tally<sup>1</sup>, Mwaka Monze<sup>5</sup>, Muzala Kapina<sup>4</sup>, Simon Agolory<sup>1</sup>, Andrew F. Auld<sup>1</sup>, Patrick Lungu<sup>2</sup>, Roma Chilengi<sup>4</sup>

**1** U.S. Centers for Disease Control and Prevention, Lusaka, Zambia, **2** Ministry of Health, Lusaka, Zambia, **3** Ministry of Home Affairs, Lusaka, Zambia, **4** Zambia National Public Health Institute, Lusaka, Zambia, **5** University Teaching Hospital, Lusaka, Zambia

\* [jhines1@cdc.gov](mailto:jhines1@cdc.gov)

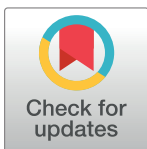

## Abstract

Deaths from COVID-19 likely exceeded official statistics in Zambia because of limited testing and incomplete death registration. We describe a sentinel COVID-19 mortality surveillance system in Lusaka, Zambia. We analyzed surveillance data on deceased persons of all ages undergoing verbal autopsy (VA) and COVID-19 testing at the University Teaching Hospital (UTH) mortuary in Lusaka, Zambia, from April 2020 through August 2021. VA was done by surveillance officers for community deaths and in-patient deaths that occurred <48 hours after admission. A standardized questionnaire about the circumstances proximal to death was used, with a probable cause of death assigned by a validated computer algorithm. Nasopharyngeal specimens from deceased persons were tested for COVID-19 using polymerase chain reaction and rapid diagnostic tests. We analyzed the cause of death by COVID-19 test results. Of 12,919 deceased persons at UTH mortuary during the study period, 5,555 (43.0%) had a VA and COVID-19 test postmortem, of which 79.7% were community deaths. Overall, 278 (5.0%) deceased persons tested COVID-19 positive; 7.1% during waves versus 1.4% during nonwave periods. Most (72.3%) deceased persons testing COVID-19 positive reportedly had fever, cough, and/or dyspnea and most (73.5%) reportedly had an antemortem COVID-19 test. Common causes of death for those testing COVID-19 positive included acute cardiac disease (18.3%), respiratory tract infections (16.5%), other types of cardiac diseases (12.9%), and stroke (7.2%). A notable portion of deceased persons at a sentinel site in Lusaka tested COVID-19 positive during waves, supporting the notion that deaths from COVID-19 might have been undercounted in Zambia. Many had displayed classic COVID-19 symptoms and been tested before death yet nevertheless died in the community, potentially indicating strained medical services during waves. The high proportion of cardiovascular diseases deaths might reflect the hypercoagulable state during severe COVID-19. Early supportive treatment and availability of antivirals might lessen future mortality.

## OPEN ACCESS

**Citation:** Hines JZ, Kapombe P, Mucheleng'anga A, Chanda SL, Hamukale A, Cheelo M, et al. (2024) COVID-19 mortality sentinel surveillance at a tertiary referral hospital in Lusaka, Zambia, 2020–2021. *PLOS Glob Public Health* 4(3): e0003063. <https://doi.org/10.1371/journal.pgph.0003063>

**Editor:** Sanjana Mukherjee, GU: Georgetown University, UNITED STATES

**Received:** November 4, 2023

**Accepted:** March 6, 2024

**Published:** March 29, 2024

**Copyright:** This is an open access article, free of all copyright, and may be freely reproduced, distributed, transmitted, modified, built upon, or otherwise used by anyone for any lawful purpose. The work is made available under the [Creative Commons CC0](https://creativecommons.org/licenses/by/4.0/) public domain dedication.

**Data Availability Statement:** The data that support the findings of this study are available from Zambia Ministry of Health, but restrictions apply to the availability of these data, which were used under license for the current study, and so are not publicly available. Data are however available from the CDC Zambia science office and authors on reasonable request and with permission of Zambia Ministry of Health. To facilitate access, contact the CDC Zambia science office at: [zm-ads@cdc.gov](mailto:zm-ads@cdc.gov).

**Funding:** This research was financially supported by the President's Emergency Plan for AIDS Relief (PEPFAR) through the Centers for Disease Control and Prevention (CDC) under the terms of a cooperative agreement with the Zambia Ministry of Health (NU2GGH002234-02 to PK, MC, and PL). No additional external funding was received for this study. The funder had no role in study design, data collection and analysis, decision to publish, or preparation of the manuscript.

**Competing interests:** The authors have declared that no competing interests exist.

## Background

Zambia has recorded >340,000 confirmed COVID-19 cases and >4,000 deaths through July 2023. However, the number of SARS-CoV-2 infections and COVID-19 deaths was likely underestimated [1–4]. Like other countries in Africa, Zambia experienced shortages of COVID-19 testing supplies, especially early in the pandemic [5], making accurate estimates of the COVID-19 pandemic's impact in Zambia difficult. Moreover, approximately one-third of deaths occur outside health facilities in Zambia, and overall death registration is low in the country [6, 7]. In 2020, less than 20% of expected deaths in the country were registered with the government, varying substantially by province from 0.0% in Northwestern Province to 52.3% in Lusaka Province [6].

Studies of mortality in Zambia during the pandemic indicate undercounting of COVID-19 deaths [8–10]. At the University Teaching Hospital (UTH) in Lusaka, Zambia, Mwananyanda and Gill *et al.* found high (16–32%) COVID-19 test positivity among sampled deceased persons, with a pattern that mirrored COVID-19 waves seen in national surveillance data [8, 9]. Routine mortality surveillance at UTH mortuary identified a similar trend during the first COVID-19 wave, which also corresponded with excess all-cause mortality [10]. A model of COVID-19 seroprevalence and corresponding mortuary data suggested COVID-19 mortality in Lusaka was on par with countries outside of Africa [11].

Assessing the toll of COVID-19 on the country might inform public health and clinical actions for COVID-19 and future potential pandemic threats in Zambia. Additionally, assessing potential surrogate indicators collected as part of routine mortality surveillance could guide future surveillance efforts in places with incomplete death registration systems like Zambia. Here in, we build upon COVID-19 mortality sentinel surveillance in Lusaka, Zambia [12], by linking COVID-19 test and verbal autopsy (VA) results to gain additional insights into COVID-19 mortality in the country. The objectives of this analysis were to 1) describe Zambia's experience doing mortality sentinel surveillance for COVID-19 in Lusaka, 2) assess how postmortem COVID-19 testing relates to demographics and circumstances of death, VA-assigned cause of death, and antemortem COVID-19 test results, 3) place the findings from this surveillance in a wider country context by applying an age-standardized COVID-19 mortality rate from Lusaka to the population of Zambia, and 4) make recommendations for mortality sentinel surveillance during future outbreaks.

## Methods

### Study design and setting

We analyzed surveillance data of deceased persons of all ages undergoing VA and COVID-19 testing at UTH mortuary in Lusaka, Zambia, from April 2020 through August 2021. In Zambia, approximately two-thirds of deaths occur in health facilities and one-third occur in the community [6]. In health facilities, a medical certification of cause of death (MCCD) form is completed by an attending clinician for deaths that occurred 48 hours or more after admission and do not undergo complete diagnostic autopsy [13]. VA is an alternative to autopsy or an MCCD form when neither option is available. In 25 districts that account for ~50% of Zambia's population, VA is done for all persons who died in the community and are brought to the local mortuary and for in-patients who died within 48 hours of admission [14].

In Lusaka District, the most populous district in the country, proof of an autopsy, MCCD form, or a VA is required to obtain the burial permit, which itself is required for funerals within the district. For this reason, over 90% deaths are registered in Lusaka District [6], and, because UTH can issue burial permits, its mortuary stores bodies for most community deaths

in the district [10, 15]. Thus, Lusaka District, with the highest death registration of all 117 districts in Zambia, was a suitable location to implement sentinel mortality surveillance during the COVID-19 pandemic. Data on in-patient deaths from COVID-19 in Zambia have been previously described [16].

### Data collection

VA entails a standardized questionnaire developed by the World Health Organization that solicits information about the deceased person's demographics, medical history, symptoms and care proximal to death, place of death, and geographic characteristics of the country/region (VA questionnaire version 2016) [17]. Additionally, questions about COVID-19 exposure, antemortem COVID-19 testing, and diagnosis by a healthcare worker were added to the VA questionnaire in October 2020. VAs were done by trained surveillance officers, who administer the questionnaire to the next-of-kin or a close relative proximal to the time of death. Based on responses to the VA questionnaire, a probable underlying cause of death was assigned by a validated computer algorithm called InterVA5, which is a cause-of-death model that interprets responses to the >300 variables on the WHO 2016 VA questionnaire to assign deaths to all 64 WHO-2016 cause of death categories [18]. The InterVA model processes likelihoods of pregnancy and each cause of death category, outputting up to three causes for each deceased person. COVID-19 questions were truncated from the cause-of-death algorithm and COVID-19 related death was not a possible underlying cause of death assigned by InterVA5. All information in the VA was reported by the respondent and no laboratory testing results were included.

During the COVID-19 pandemic, UTH mortuary did COVID-19 testing on deceased persons of all ages when supplies were available, as part of the country's COVID-19 surveillance strategy [19]. Trained mortuary attendants performed specimen collection for COVID-19 testing within 24 hours of receipt of the body. A nasopharyngeal specimen was collected from deceased persons using scored swabs inserted into the posterior nasopharynx, while taking appropriate infection prevention measures during specimen collection. The specimen was then transported in viral transport media on ice to the virology lab at UTH where it was tested using the real-time polymerase chain reaction (PCR) test to detect SARS-CoV-2 RNA. In late December 2020, rapid diagnostic tests (RDTs) for SARS-CoV-2 viral antigens were introduced in Zambia, and mortuary attendants began conducting RDTs on deceased persons in early 2021 when supplies allowed. From April 2020 through December 2020, all testing was done by PCR, and from January 2021 through August 2021, testing was a mix of PCR tests and RDTs. COVID-19 test results were recorded in a paper register in the mortuary with the deceased person's name, date of death, and basic demographic information. Although both PCR tests and RDTs were used at UTH mortuary in 2021, the testing modality was not captured in the testing register. Data from the COVID-19 test register were manually matched to VA data by data clerks based on name, place of residence, sex, age at death, and date of death. Positive COVID-19 test from deceased persons at UTH mortuary were reported to Zambia National Public Health Institute (ZNPHE).

### Study definitions

COVID-19 test positivity was defined as the number of deceased persons testing COVID-19 positive by PCR or RDT divided by the total number of deceased persons who were tested from April 2020 through August 2021. COVID-19 epidemic waves were defined based on visual inspection of an epidemic curve generated using publicly available data, with the predominant SARS-CoV-2 variant driving infections determined by genomic sequencing data

from Zambia [16]. A sudden death was defined as dying within 24 hours of being in regular/good health. Classic COVID-19 symptoms were defined as fever, cough, and/or shortness of breath. Throughout this paper, SARS-CoV-2 viral RNA (i.e., PCR) or antigen (i.e., RDT) testing is referred to as COVID-19 testing.

## Data analysis

We analyzed data from deceased persons with both a VA and postmortem COVID-19 test results. First, we analyzed deceased persons' demographic characteristics and circumstances of proximal to death (i.e., reported symptoms, medical history, care, and place of death), as captured by VA, stratified by their postmortem COVID-19 test results. We used bivariable logistic regression to identify factors associated with testing COVID-19 positive at the time of death (i.e., postmortem). The chi-square test was used to calculate *p* values. Additionally, the monthly postmortem COVID-19 test positivity trend among deceased persons at UTH mortuary was compared to the test positivity for all COVID-19 tests in Zambia [20].

Next, we analyzed underlying probable cause of death for deceased persons as assigned by the InterVA5 model, stratified by their postmortem COVID-19 test results. We also analyzed antemortem COVID-19 test results and health worker COVID-19 diagnosis as reported during VA. Lastly, for deceased persons with antemortem COVID-19 test results, we calculated the sensitivity and specificity of reporting testing COVID-19 positive antemortem using postmortem COVID-19 test positive by PCR or RDT at death as the gold standard comparator.

We estimated the annual age-standardized COVID-19 death rate for Lusaka by multiplying the age-specific COVID-19 positivity by the age-specific deaths from all-causes based on Lusaka mortuary registrations and the Lusaka population projection for 2021 [11]. We then multiplied the age-standardized COVID-19 death rate by the population projection for Zambia in 2021, adjusting for difference in age structure between Lusaka Province and Zambia, to estimate the annual number of COVID-19 deaths and compared this number to officially reported deaths in the country [21]. For this analysis, we assumed SARS-CoV-2 transmission was uniform in Zambia [1], that COVID-19 contributed to the cause of death for 80% of those testing positive [22–24], and that 10% of deaths were not registered in the Lusaka mortuary registrations data [11].

The study protocol was approved by the ERES Converge IRB and National Health Research Authority in Lusaka, Zambia. This activity was reviewed by CDC and was conducted consistent with applicable federal law and CDC policy (See e.g., 45 C.F.R. part 46.102(l)(2), 21 C.F.R. part 56; 42 U.S.C. §241(d); 5 U.S.C. §552a; 44 U.S.C. §3501 et seq.). All methods were carried out in accordance with relevant guidelines and regulations. This project met requirements for waiver of informed consent documentation, which was granted by ERES Converge IRB in Zambia. Data for this project were accessed on 4/20/2023 and authors did not have access to information that could identify individual participants during or after data collection.

## Results

### Sample size

There were 12,919 deceased persons brought to UTH mortuary during April 2020 through August 2021 (monthly range 564 [April 2020] to 1,570 [June 2021]). Of these, 9,145 (70.8%) had a PCR or RDT COVID-19 test postmortem and 10,247 (79.3%) had a VA done (Fig 1). Of 9,145 deceased persons who were tested for COVID-19, 3,061 were tested in 2020 and 6,084 in 2021.

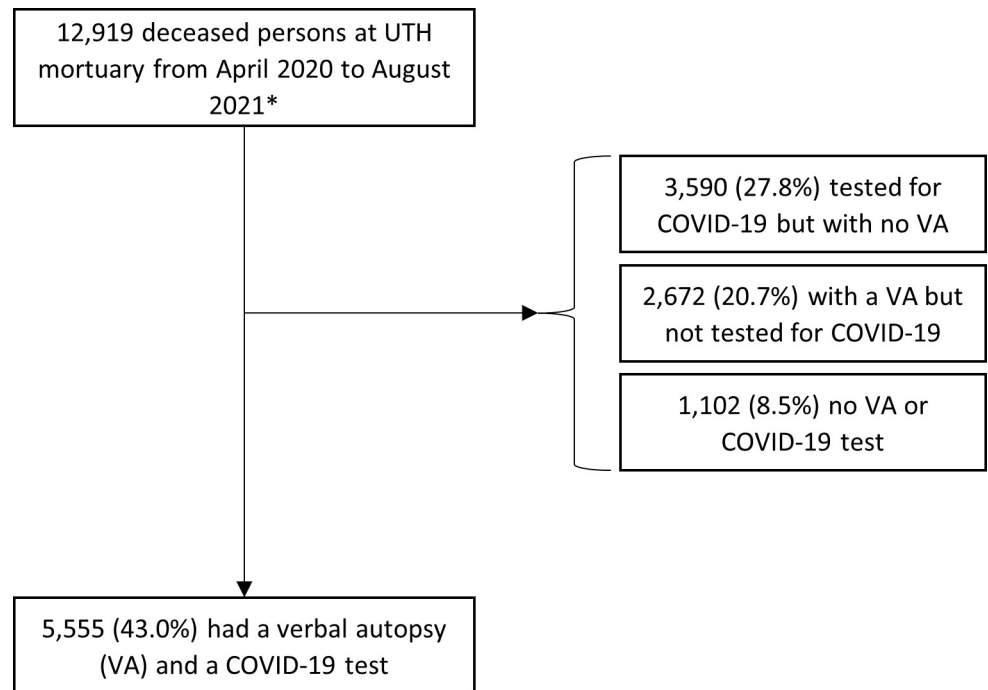

**Fig 1.** Flow diagram of deceased persons at University Teaching Hospital (UTH) Mortuary April 2020 to August 2021.

<https://doi.org/10.1371/journal.pgph.0003063.g001>

### Analysis of deceased persons with postmortem COVID-19 test and VA

In total, 5,555 (43.0%) had both a postmortem COVID-19 test and a VA done during this period. The proportion of deceased persons at UTH mortuary who had a COVID-19 test and VA done varied per month from 2% (April 2020) to 64% (January 2021) (S1 Fig). Some months (e.g., August 2020) had very low numbers of COVID-19 tests done on deceased persons when testing supplies ran low nationally. Approximately four-fifths (79.7%) had died at home. Overall, 59.1% of deceased persons were male and the median age was 46 years (interquartile range: 30–68) (Table 1). Hypertension (34.8%) and HIV (22.2%) were the most common medical morbidities reported.

Of deceased persons who were tested for COVID-19 and had a VA done, 278 (5.0%) tested COVID-19 positive. COVID-19 test positivity by month varied from 0.0% (multiple months) to 22.7% (July 2020) (Fig 2). Overall, 250 (89.9%) persons died during a COVID-19 wave. COVID-19 positivity was 7.1% during wave periods and was 1.4% during nonwave periods ( $p$  value <0.01). Two distinct waves were observed in the postmortem COVID-19 test results that corresponded with the first (ancestral strain) and third (delta variant) COVID-19 waves nationally. However, the second (beta variant) COVID-19 wave was not evident in the UTH mortuary COVID-19 testing data (Fig 2). COVID-19 test positivity was 5.0% among persons who died in the community and 4.9% among those who died within 48 hours of admission ( $p$  value = 0.93) (S1 Table).

Deceased persons testing COVID-19 positive were more likely to be older compared to those testing COVID-19 negative (64.0%  $\geq$ 50 years-old compared to 42.4%;  $p$  value <0.01) (Table 1); COVID-19 positivity was 1.7% among deceased persons aged 0–17 years, 3.7% among those 18–49 years, and 7.4% among those  $\geq$ 50 years [S1 Table] ( $p$  value <0.01). Additionally, medical comorbidities that were more commonly reported among deceased persons

**Table 1. Patient characteristics and circumstances of death of deceased persons with a verbal autopsy and postmortem COVID-19 test—Lusaka, Zambia, April 2020 to August 2021.**

| Variables                                   | Overall, n (%) | Positive COVID-19 test, n (%) | Negative COVID-19 test, n (%) | Odds ratio (95% CI) | p value | N missing <sup>¶</sup> |
|---------------------------------------------|----------------|-------------------------------|-------------------------------|---------------------|---------|------------------------|
|                                             | N = 5,555      | N = 278                       | N = 5,277                     |                     |         |                        |
| Sex                                         |                |                               |                               |                     | 0.876   | 0                      |
| Male                                        | 3,282 (59.1)   | 163 (58.6)                    | 3,119 (59.1)                  |                     |         |                        |
| Female                                      | 2,273 (40.9)   | 115 (41.4)                    | 2,158 (40.9)                  | 1.02 (0.80, 1.3)    |         |                        |
| Age group                                   |                |                               |                               |                     | < 0.001 | 0                      |
| 0–17                                        | 765 (13.8)     | 13 (4.7)                      | 752 (14.3)                    |                     |         |                        |
| 18–49                                       | 2,374 (42.7)   | 87 (31.3)                     | 2,287 (43.3)                  | 2.20 (1.22, 3.96)   |         |                        |
| ≥50                                         | 2,416 (43.5)   | 178 (64.0)                    | 2,238 (42.4)                  | 4.60 (2.60, 8.13)   |         |                        |
| Comorbidities                               |                |                               |                               |                     |         |                        |
| HIV positive                                | 1,184 (22.2)   | 67 (24.5)                     | 1,117 (22.0)                  | 1.15 (0.87, 1.53)   | 0.334   | 216                    |
| Hypertension                                | 1,700 (34.8)   | 113 (42.3)                    | 1,587 (34.4)                  | 1.40 (1.09, 1.80)   | 0.008   | 674                    |
| Cardiac disease                             | 464 (8.4)      | 35 (12.7)                     | 429 (8.2)                     | 1.63 (1.13, 2.35)   | 0.009   | 62                     |
| Diabetes mellitus                           | 589 (10.7)     | 43 (15.6)                     | 546 (10.5)                    | 1.58 (1.13, 2.21)   | 0.008   | 58                     |
| Asthma                                      | 173 (3.1)      | 9 (3.3)                       | 164 (3.1)                     | 1.04 (0.53, 2.06)   | 0.912   | 59                     |
| Chronic obstructive pulmonary disease       | 331 (6.8)      | 17 (6.3)                      | 314 (6.8)                     | 0.93 (0.56, 1.54)   | 0.776   | 664                    |
| Chronic kidney disease                      | 161 (2.9)      | 13 (4.7)                      | 148 (2.8)                     | 1.70 (0.95, 3.03)   | 0.075   | 55                     |
| Liver disease                               | 193 (3.5)      | 9 (3.2)                       | 184 (3.5)                     | 0.92 (0.47, 1.82)   | 0.81    | 54                     |
| Cancer                                      | 263 (4.8)      | 14 (5.1)                      | 249 (4.8)                     | 1.06 (0.61, 1.85)   | 0.827   | 55                     |
| Tobacco use                                 | 1,047 (22.9)   | 40 (15.9)                     | 1,007 (23.3)                  | 0.62 (0.44, 0.88)   | 0.007   | 987                    |
| Alcohol use                                 | 2,058 (42.2)   | 75 (28.2)                     | 1,983 (43.0)                  | 0.52 (0.40, 0.68)   | < 0.001 | 677                    |
| Place of death                              |                |                               |                               |                     | 0.926   | 11                     |
| Home                                        | 4,421 (79.7)   | 222 (80.1)                    | 4,199 (79.7)                  |                     |         |                        |
| Health facility                             | 1,123 (20.3)   | 55 (19.9)                     | 1,068 (20.3)                  | 0.97 (0.72, 1.32)   |         |                        |
| Died during a COVID wave period*            | 3,511 (63.2)   | 250 (89.9)                    | 3,261 (61.8)                  | 5.52 (3.72, 8.19)   | < 0.001 | 0                      |
| Died suddenly <sup>†</sup>                  | 1,451 (26.1)   | 61 (21.9)                     | 1,390 (26.4)                  | 0.79 (0.59, 1.05)   | 0.104   | 2                      |
| Received care before death <sup>‡</sup>     | 3,724 (67.2)   | 185 (66.5)                    | 3,539 (67.3)                  | 0.97 (0.75, 1.25)   | 0.803   | 16                     |
| Tested for COVID-19 antemortem <sup>§</sup> | 1,850 (44.0)   | 97 (73.5)                     | 1,753 (43.0)                  | 3.68 (2.49, 5.44)   | < 0.001 | 111                    |
| Symptoms proximal to death                  |                |                               |                               |                     |         |                        |
| Fever                                       | 1,902 (34.4)   | 111 (40.1)                    | 1,791 (34.1)                  | 1.29 (1.01, 1.65)   | 0.043   | 32                     |
| Cough                                       | 1,908 (34.4)   | 125 (45.0)                    | 1,783 (33.9)                  | 1.60 (1.25, 2.03)   | < 0.001 | 13                     |
| Shortness of breath                         | 2,313 (41.8)   | 142 (51.1)                    | 2,171 (41.3)                  | 1.49 (1.17, 1.89)   | 0.001   | 15                     |
| Tachypnea                                   | 1,195 (21.6)   | 72 (26.0)                     | 1,123 (21.3)                  | 1.30 (0.98, 1.71)   | 0.066   | 10                     |
| Chest pain                                  | 1,441 (26.8)   | 88 (32.2)                     | 1,353 (26.5)                  | 1.32 (1.01, 1.71)   | 0.039   | 185                    |
| Change/loss of taste or smell <sup>¶</sup>  | 444 (11.9)     | 38 (29.9)                     | 406 (11.3)                    | 3.37 (2.27, 4.99)   | < 0.001 | 593                    |
| Headache                                    | 1,614 (30.1)   | 90 (33.0)                     | 1,524 (30.0)                  | 1.15 (0.89, 1.49)   | 0.292   | 196                    |
| Vomiting                                    | 1,481 (26.7)   | 55 (19.8)                     | 1,426 (27.1)                  | 0.66 (0.49, 0.9)    | 0.008   | 16                     |
| Diarrhea                                    | 1,093 (19.8)   | 44 (15.9)                     | 1,049 (20.0)                  | 0.76 (0.55, 1.05)   | 0.098   | 21                     |
| Abdominal pain                              | 1,334 (24.4)   | 63 (23.1)                     | 1,271 (24.5)                  | 0.92 (0.69, 1.23)   | 0.593   | 95                     |
| Rash                                        | 115 (2.1)      | 2 (0.7)                       | 113 (2.1)                     | 0.33 (0.08, 1.34)   | 0.122   | 14                     |
| Confusion                                   | 407 (8.3)      | 19 (7.2)                      | 388 (8.4)                     | 0.84 (0.52, 1.36)   | 0.483   | 669                    |

(Continued)

Table 1. (Continued)

| Variables                               | Overall, n (%) | Positive COVID-19 test, n (%) | Negative COVID-19 test, n (%) | Odds ratio (95% CI) | p value | N missing <sup>¶¶</sup> |
|-----------------------------------------|----------------|-------------------------------|-------------------------------|---------------------|---------|-------------------------|
|                                         | N = 5,555      | N = 278                       | N = 5,277                     |                     |         |                         |
| Classic COVID-19 symptoms <sup>**</sup> | 3,448 (62.1)   | 201 (72.3)                    | 3,247 (61.5)                  | 1.63 (1.25, 2.13)   | < 0.001 | 0                       |
| Asymptomatic <sup>††</sup>              | 1,179 (21.2)   | 44 (15.8)                     | 1,135 (21.5)                  | 0.69 (0.49, 0.95)   | 0.025   | 0                       |

\* Wave period defined as Jun 30 to Sep 21, 2020 (ancestral/wave 1), Jan 3-Mar 19, 2021 (beta variant/wave 2), and May 28-Aug 22, 2021 (delta variant/wave 3).

† A sudden death was defined as dying within 24 hours of being in regular/good health.

‡ Indicates person received care for the condition that led to death.

§ COVID-19 questions added to VA in October 2020.

\*\* Defined as fever, cough, or shortness of breath.

†† Defined as an absence of any of the following: fever, cough, shortness of breath, tachypnea, chest pain, headache, vomiting, diarrhea, abdominal pain, rash, or mental confusion.

¶¶ Number missing deducted from total for each group.

All variables in table derived from verbal autopsy using a standardized questionnaire developed by the World Health Organization administered by trained surveillance officers to the next-of-kin or a close relative proximal to the time of death.

<https://doi.org/10.1371/journal.pgph.0003063.t001>

testing COVID-19 positive compared to those testing COVID-19 negative were hypertension (42.3% vs. 34.4%;  $p$  value <0.01), cardiac disease (12.7% vs. 8.2%;  $p$  value <0.01), and diabetes mellitus (15.6% vs. 10.5%;  $p$  value <0.01). Compared to deceased persons testing COVID-19 negative, those testing COVID-19 positive were more likely to had experienced  $\geq 1$  classic COVID-19 symptom (72.3% vs. 61.5%;  $p$  value <0.01), and had been tested for COVID-19 antemortem (73.5% vs. 43.0%;  $p$  value <0.01).

### Analysis of verbal autopsy cause of death by postmortem COVID-19 test status

Acute (i.e., ischemic) cardiac diseases were the most common underlying cause of death by VA for deceased persons who tested COVID-19 positive and negative (18.3% and 12.2% of deaths, respectively) (Tables 2 and 3). For the 278 deceased persons who tested COVID-19 positive, respiratory tract infections were the second most common cause of death by VA, whereas for the 5,277 that tested COVID-19 negative, respiratory tract infections were the fifth most common (7.8%). Other common causes of death in both groups were other types of cardiac/circulatory system diseases (e.g., heart failure, pericarditis, venous thromboembolic disease), stroke, and HIV related death.

### Analysis of antemortem COVID-19 test results

Of the 4,317 deceased persons with a VA and COVID-19 testing done from October 2020 through August 2021, 1,850 (42.9%) deceased persons were reportedly tested for COVID-19 prior to death (i.e., antemortem) (S2 Fig); of these, 201 (10.9%) were reportedly COVID-19 positive antemortem. Although antemortem COVID-19 test result information was not collected during the first wave in Zambia, reported antemortem COVID-19 positivity aligned with the second (beta variant) and third (delta variant) waves (S3 Fig). By place of death, 41.4% of persons who died in the community were reportedly tested prior to death compared with 48.5% of persons who died within 48 hours of arriving at a health facility ( $p$  value <0.01) (S2 Table). Persons who died within 48 hours of arriving at a health facility had greater antemortem COVID-19 positivity than those who died in the community (14.9% vs. 9.6%;  $p$  value

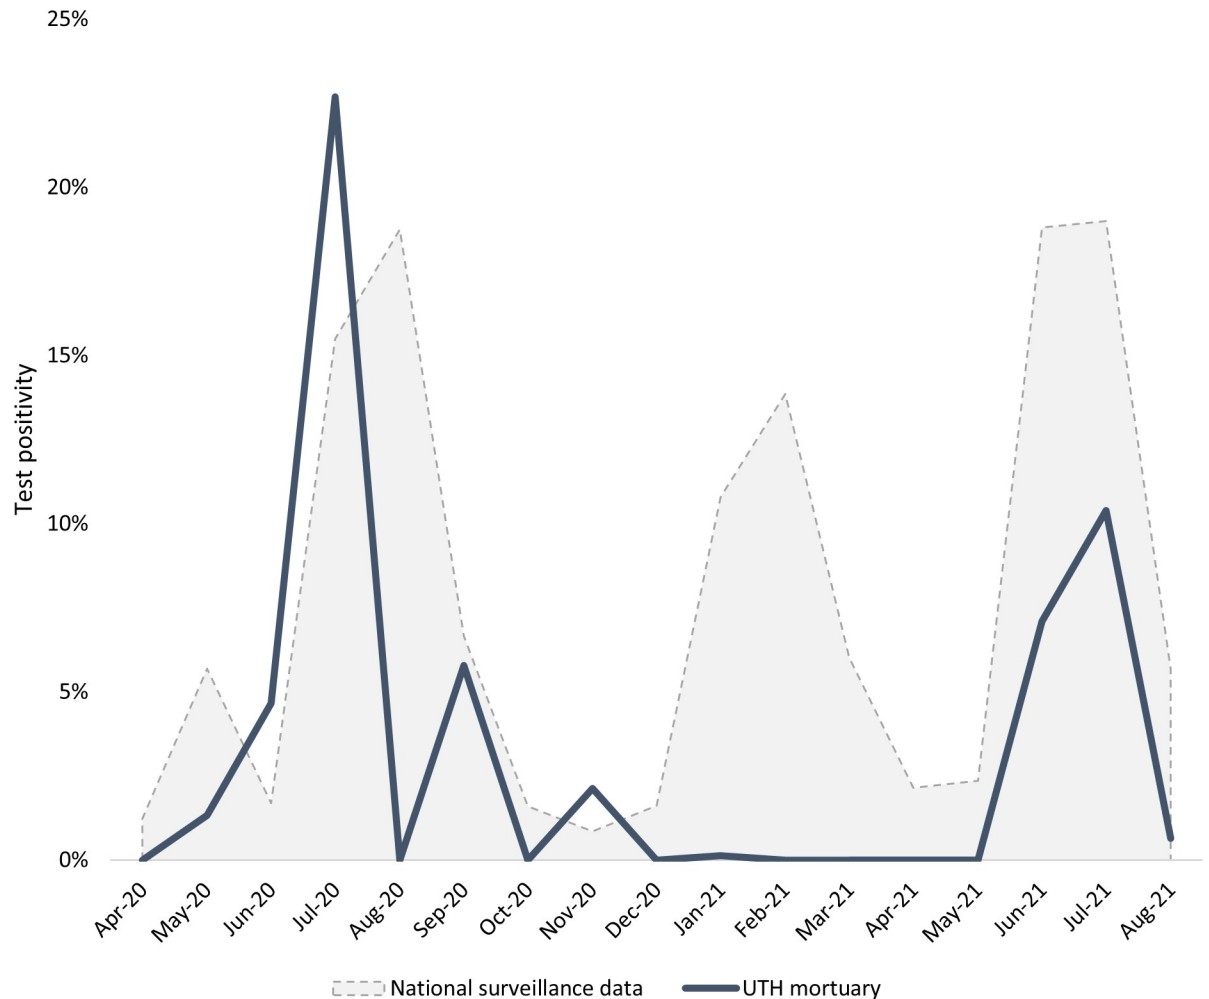

**Fig 2. Postmortem COVID-19 test positivity among deceased persons with a verbal autopsy—Lusaka, Zambia, April 2020 to August 2021.** Source for national surveillance data: Zambia National Public Health Institute.

<https://doi.org/10.1371/journal.pgph.0003063.g002>

**Table 2. Probable causes of death among deceased persons testing COVID-19 positive—Lusaka, Zambia, April 2020 to August 2021 (N = 278)\*.**

| Rank | Probable cause of death                | n (%)     |
|------|----------------------------------------|-----------|
| 1    | Acute cardiac disease                  | 51 (18.3) |
| 2    | Respiratory tract infections/pneumonia | 46 (16.5) |
| 3    | Other/unspecified cardiac disease      | 36 (12.9) |
| 4    | Stroke                                 | 20 (7.2)  |
| 5    | HIV/AIDS related death                 | 17 (6.1)  |
| 6    | Pulmonary tuberculosis                 | 16 (5.8)  |
| 7    | Diabetes mellitus                      | 14 (5.0)  |
| 8    | Diarrheal diseases                     | 11 (4.0)  |
| 9    | Digestive neoplasms                    | 8 (2.9)   |
| 10   | Indeterminate                          | 7 (2.5)   |

\* Underlying cause of death determined by verbal autopsy using WHO 2016 tool. This cause of death is considered probable and is not an official cause of death registered on a death certificate

<https://doi.org/10.1371/journal.pgph.0003063.t002>



**Table 3. Probable causes of death among deceased persons testing COVID-19 negative—Lusaka, Zambia, April 2020 to August 2021 (N = 5,277)\*.**

| Rank | Probable cause of death                | n (%)      |
|------|----------------------------------------|------------|
| 1    | Acute cardiac disease                  | 646 (12.2) |
| 2    | HIV/AIDS related death                 | 562 (10.6) |
| 3    | Other/unspecified cardiac disease      | 560 (10.6) |
| 4    | Stroke                                 | 469 (8.9)  |
| 5    | Respiratory tract infections/pneumonia | 413 (7.8)  |
| 6    | Diarrheal diseases                     | 288 (5.5)  |
| 7    | Pulmonary tuberculosis                 | 271 (5.1)  |
| 8    | Indeterminate                          | 227 (4.3)  |
| 9    | Digestive neoplasms                    | 222 (4.2)  |
| 10   | Diabetes mellitus                      | 190 (3.6)  |

\* Underlying cause of death determined by verbal autopsy using WHO 2016 tool. This cause of death is considered probable and is not an official cause of death registered on a death certificate

<https://doi.org/10.1371/journal.pgph.0003063.t003>

<0.01). The sensitivity and specificity of a COVID-19 positive test antemortem was 66.7% (95% CI: 56.3–76.0) and 91.7% (95% CI: 90.3–93.0) compared to testing COVID-19 positive postmortem by PCR or RDT (S3 Table).

### Age-standardized COVID-19 death rate

The estimated age-standardized COVID-19 death rate per 100,000 population was 219 (95% confidence interval [CI]: 184–254) in 2020 and 211 (95% CI: 175–247) in 2021 (Table 4). This extrapolated to 42,032 (95% CI: 35,260–48,804) COVID-19 deaths in 2020 and 40,486 (95% CI: 33,526–47,446) COVID-19 deaths in 2021.

## Discussion

A notable portion of deceased persons who died at home or shortly after admission tested COVID-19 positive postmortem during COVID-19 waves in Lusaka, Zambia, and the findings of VA indicate that many likely died from COVID-19-related conditions. If the trend of COVID-19 positivity among deceased persons at UTH was indicative of the national picture,

**Table 4. Age-standardized death rate from COVID-19 in Lusaka and estimated number of COVID-19 deaths in Zambia.**

|                                                                                | 2020                   | 2021                   |
|--------------------------------------------------------------------------------|------------------------|------------------------|
| Age-standardized COVID-19 death rate per 100,000 population in Lusaka, Zambia* | 219 (184–254)          | 211 (175–247)          |
| Estimated COVID-19 deaths in Zambia <sup>†</sup>                               | 42,032 (35,260–48,804) | 40,486 (33,526–47,446) |
| Officially recorded COVID-19 deaths <sup>‡</sup>                               | 382                    | 3,315                  |

\* Calculated from the estimated number of age-specific death registrations in Lusaka (Source: Sheppard R, et al. Nat Commun. 2023;14). The estimate assumes SARS-CoV-2 transmission was uniform in Zambia, that COVID-19 contributed to the cause of death for 80% of those testing positive, and that 10% of deaths were not registered in Lusaka.

<sup>†</sup> Multiplied age-standardized COVID-19 death rate against the 2010 Zambia Census updated 2021 population projection, adjusting for difference in age structure between Lusaka Province and Zambia.

<sup>‡</sup> Source: Our World in Data COVID-19 data dashboard: <https://ourworldindata.org/covid-deaths>

<https://doi.org/10.1371/journal.pgph.0003063.t004>

then COVID-19 was the second most common cause of death after HIV in Zambia during this period [6].

This mortality surveillance project was done in a district with high death registration for Zambia. However, because death registration in Zambia is incomplete, had COVID-19 mortality surveillance been more widely implemented during the pandemic, our findings indicate the official count of deaths from COVID-19 would likely had been greater [11]. While our estimate of the COVID-19 death rate in Zambia is greater than one from WHO, it is similar to another widely cited estimate [3, 4]. If other countries in Africa experienced a similar situation during the pandemic, then the continental estimate of reported COVID-19 deaths in Africa of ~175,000 was likely low [25]. Unfortunately, mortality data from COVID-19 has been limited in Africa [8–10, 26, 27], highlighting a need to strengthen mortality surveillance on the continent [28]. Given the substantial number of deaths occurring outside health facilities in Zambia, health facility mortuaries might be a convenient location for mortality sentinel surveillance in future outbreaks. As vital statistics systems are strengthened in Zambia, being able to rapidly implement mortuary-based mortality sentinel surveillance could serve a valuable role in surveillance and case investigation during an unfolding public health threat.

While many deceased persons tested COVID-19 positive during the first and third waves in Zambia, few tested COVID-19 positive during the second (beta variant) wave. While few tested positive postmortem during the second wave, the antemortem testing data in this analysis did correlate with national testing data, as did data from Gill *et al.* [9]. The reasons for this discrepancy are not readily apparent, although COVID-19 positivity in national testing data was also lowest during the beta variant wave [29]. This finding might have been related to the rapid and widespread deployment of COVID-19 RDTs, which are less sensitive than PCR tests, during the middle of the beta variant wave in Zambia. Also, correct application of COVID-19 RDTs by mortuary attendants could have improved over time with more experience.

Only a minority of deceased persons testing COVID-19 positive at death were classified as respiratory tract infections by verbal autopsy. This could reflect the non-specific symptomology of COVID-19, that persons were dying from sequelae of the hypercoagulable state associated with severe COVID-19—noting cardiac diseases and strokes were the other common causes of death in this study [30], or limitations of VA in assigning an accurate cause of death [31, 32]. While VA algorithms for COVID-19 have been developed and performed well at predicting COVID-19 deaths [33], implementation of algorithms with a COVID-19-specific cause of death have been delayed [17]. Our findings indicated that simply relying on a respiratory underlying cause of death from a VA as a surrogate for COVID-19 deaths might underestimate the true burden, demonstrating the value of also measuring all-cause mortality during pandemics [34–36]. Furthermore, differences in antemortem and postmortem COVID-19 test results meant that antemortem positive COVID-19 test was not very sensitive for a positive COVID-19 test at death. This finding could be related to the time between antemortem and postmortem COVID-19 tests, as maximal viral shedding occurs early in infection whereas severe illness and death usually occurs later in the disease course [37, 38]. The findings of VA-coded cause of death and antemortem COVID-19 testing history highlight the challenges of relying on surrogate indicators for surveillance and emphasize the importance of availability of adequate diagnostic tests during outbreaks.

Most persons testing COVID-19 positive postmortem reportedly displayed classic symptoms and were tested before dying yet nevertheless died in the community, potentially pointing to a strained medical system during COVID-19 waves in Zambia. Minchella *et al.* observed increases in the proportion of severe COVID-19 among hospitalized patients within waves in Zambia, postulating this pattern reflected dwindling healthcare capacity as COVID-19 waves

progressed [16]. Beyond better access to diagnostic tests, improved availability of antivirals in Zambia could avert mortality during future COVID-19 waves or for other respiratory disease outbreaks like influenza. To address COVID-19's burden on the health care, Zambia implemented a home-based care model for mild disease and has been an early pilot country in Africa for offering nirmatrelvir/ritonavir [39, 40].

Our findings were similar to a concurrent postmortem study done by Mwananyanda and Gill *et al.* [8, 9], which was unsurprising considering overlap with this surveillance system. However, our data demonstrated a lower percent positivity of deceased persons than Mwananyanda and Gill (i.e., 5.0% vs. 28.1%) as well as a greater proportion of COVID-19 testing prior to death (43.9% vs. 26.8%). Reasons for these differences could reflect different enrollment procedures, different testing approaches (PCR only vs. a mix of PCR and RDTs), or other unaccounted-for bias in either project. This analysis covered a longer period, included data from more deceased persons, and utilized a widely adopted VA tool. Despite the differences, the overarching conclusions are aligned: limited COVID-19 test availability in Zambia likely explains the gap between official statistics and estimated deaths from COVID-19 [3, 4].

There are several limitations to this study. First, COVID-19 test positivity does not establish causality of COVID-19 for the cause of death. No additional pathologic testing was performed to confirm a causal role of SARS-CoV-2, and while a large portion of SARS-CoV-2 infections are asymptomatic [41], a COVID-19 positive test result at death likely reflects such a role [22]. Next, the findings of this study cannot shed light on the proportion of deaths from COVID-19 in the community versus in health facilities because our data did not include testing of all inpatient deaths from COVID-19. Not all deceased persons at UTH were tested for COVID-19 because of an inconsistent supply of testing kits and reagents, and less than half of deceased persons had both a COVID-19 test and VA during the period under review. Furthermore, we could not distinguish between PCR and RDT tests since this information was not recorded in the COVID-19 testing register; this might matter because PCR and RDTs have different diagnostic characteristics—RDTs can have high false negative results, and PCR tests are subject to false positive via cross-contamination [42–45]. Additionally, although respondents were prompted to provide information associated with the deceased person's final illness, the timing of antemortem COVID-19 testing in the VA questionnaire was general (i.e., a “recent test for COVID-19”). Furthermore, VA responses could be subject to recall and social desirability biases by the next-of-kin completing the questionnaire. Next, VA-coded causes of death categories are broad, and the assignment was not an official cause of death. Lastly, these findings reflect experience from a large tertiary referral hospital in a capital city and the findings might not be generalizable to other parts of Zambia or countries in Africa.

## Conclusions

This project demonstrates the value of mortality sentinel surveillance in a low-income country during a global pandemic. Postmortem testing of primarily community deaths at UTH mortuary demonstrated that deceased persons frequently tested positive for COVID-19 during waves, potentially indicating that deaths from COVID-19 were occurring outside the health system in Zambia and were greater than official statistics. This information was important for the Ministry of Health and ZNPHI to communicate the seriousness of the pandemic to policy-makers and provide evidence for implementation of public health and social measures before widespread SARS-CoV-2 exposure and vaccine availability. Additional countries in Africa might publish similar mortality surveillance to provide a better idea of the impact of COVID-19 on the continent. Improving access to diagnostic tests, including supporting regional manufacturing efforts [46], could help alleviate under-ascertainment of deaths in future

outbreaks. Additionally, while surrogate indicators can be used for surveillance in the absence of adequate testing, there are potential limitations which might be difficult to understand without further studies. Next, seeing that many COVID-19-positive deceased persons displayed classic symptoms and had been tested prior to dying, strengthening community-based health services during outbreaks could mitigate anticipated strain on health facilities. Sequencing genomes of COVID-19 positive specimens collected from deceased persons could have a role in assessing disease severity when new SARS-CoV-2 variant strains are detected. Strengthening mortality surveillance during outbreaks provided useful insights to inform public health and clinical care to inform decision makers. Further investing in routine mortality surveillance while death registration systems are expanded in Zambia can inform cause of death trend analyses, help monitor for public health events, and serve a role in preparing for potential epidemics.

## Supporting information

**S1 Fig. Sample size of deceased persons with VA and COVID-19 test by month at University Teaching Hospital mortuary, Lusaka, Zambia, April 2020 to August 2021.** “\*” Indicate a month when COVID-19 waves were occurring during most days.

(TIF)

**S2 Fig. Antemortem COVID-19 testing history among deceased persons at University Teaching Hospital mortuary, Lusaka, Zambia, October 2020 to August 2021\*.** \* Questions about antemortem COVID-19 testing and diagnosis by a healthcare worker were added to the standardized verbal autopsy tool in October 2020.

(TIF)

**S3 Fig. Antemortem COVID-19 test positivity among deceased persons with a verbal autopsy—Lusaka, Zambia, October 2020 to August 2021.**

(TIF)

**S1 Table. COVID-19 test positivity of deceased persons with a verbal autopsy and COVID-19 test—Lusaka, Zambia, April 2020 to August 2021.**

(DOCX)

**S2 Table. Antemortem COVID-19 testing history according to place of death for deceased persons at University Teaching Hospital mortuary, Lusaka, Zambia, October 2020 to August 2021\*.**

(DOCX)

**S3 Table. Diagnostic accuracy of COVID-19 test history prior to death for testing COVID-19 positive at death at University Teaching Hospital mortuary, Lusaka, Zambia, October 2020 to August 2021.**

(DOCX)

## Acknowledgments

Mainga Chiinda, Stella Mulasikwanda, Haggai B Samu, Mary Tembo (Ministry of Health).

## Author Contributions

**Conceptualization:** Jonas Z. Hines, Priscilla Kapombe.

**Data curation:** Priscilla Kapombe, Adam Mucheleng'anga, Stephen L. Chanda, Amos Hamukale, Mwaka Monze.

**Formal analysis:** Jonas Z. Hines.

**Investigation:** Jonas Z. Hines, Priscilla Kapombe.

**Methodology:** Jonas Z. Hines, Priscilla Kapombe.

**Project administration:** Priscilla Kapombe.

**Visualization:** Jonas Z. Hines.

**Writing – original draft:** Jonas Z. Hines.

**Writing – review & editing:** Priscilla Kapombe, Adam Mucheleng'anga, Stephen L. Chanda, Amos Hamukale, Mweene Cheelo, Kashala Kamalanga, Leigh Tally, Mwaka Monze, Muzala Kapina, Simon Agolory, Andrew F. Auld, Patrick Lungu, Roma Chilengi.

## References

1. Mulenga LB, Hines JZ, Fwoloshi S, Chirwa L, Siwingwa M, Yingst S, et al. Prevalence of SARS-CoV-2 in six districts in Zambia in July, 2020: a cross-sectional cluster sample survey. *Lancet Glob Heal* [Internet]. 2021; 9(6):e773–81. Available from: [https://doi.org/10.1016/S2214-109X\(21\)00053-X](https://doi.org/10.1016/S2214-109X(21)00053-X) PMID: 33711262
2. Lewis H, Ware H, Whelan M, Subissi L, Li Z, Ma X, et al. SARS-CoV-2 infection in Africa: a systematic review and meta-analysis of standardised seroprevalence studies, from January 2020 to December 2021. *BMJ Glob Heal* [Internet]. 2022; 7(8):e008793. Available from: <https://doi.org/10.1136/bmjgh-2022-008793> PMID: 35998978
3. World Health Organization (WHO). 2023. [cited 2023 Jul 26]. Global excess deaths associated with COVID-19 (modelled estimates). Available from: <https://www.who.int/data/sets/global-excess-deaths-associated-with-covid-19-modelled-estimates>
4. Estimating excess mortality due to the COVID-19 pandemic: a systematic analysis of COVID-19-related mortality, 2020–21. *Lancet* (London, England). 2022 Apr; 399(10334):1513–36. [https://doi.org/10.1016/S0140-6736\(21\)02796-3](https://doi.org/10.1016/S0140-6736(21)02796-3) PMID: 35279232
5. Nkengasong J. Let Africa into the market for COVID-19 diagnostics. *Nature*. 2020; 580(7805):565. <https://doi.org/10.1038/d41586-020-01265-0> PMID: 32346145
6. Zambia Statistics Agency / Ministry of Home Affairs. 2020 Vital Statistics Report [Internet]. Lusaka, Zambia; 2022. Available from: <https://www.zamstats.gov.zm/download/5400/?tmstv=1709591260&v=8464>
7. Central Statistical Office and Ministry of Home Affairs. 2019 Vital Statistics Report. Lusaka, Zambia; 2022.
8. Mwananyanda L, Gill CJ, MacLeod W, Kwenda G, Pieciak R, Mupila Z, et al. Covid-19 deaths in Africa: prospective systematic postmortem surveillance study. *BMJ*. 2021;372. <https://doi.org/10.1136/bmj.n334> PMID: 33597166
9. Gill CJ, Mwananyanda L, MacLeod WB, Kwenda G, Pieciak RC, Etter L, et al. What is the prevalence of COVID-19 detection by PCR among deceased individuals in Lusaka, Zambia? A postmortem surveillance study. *BMJ Open*. 2022 Dec; 12(12):e066763. <https://doi.org/10.1136/bmjopen-2022-066763> PMID: 36600354
10. Hamukale A, Hines JZ, Sinyange N, Fwoloshi S, Malambo W, Sivile S, et al. SARS-CoV-2 Mortality Surveillance among Community Deaths brought to University Teaching Hospital Mortuary in Lusaka, Zambia, 2020. *medRxiv* [Internet]. 2021 Jan 1;2021.11.14.21266330. Available from: <http://medrxiv.org/content/early/2021/11/15/2021.11.14.21266330.abstract>
11. Sheppard RJ, Watson OJ, Pieciak R, Lungu J, Kwenda G, Moyo C, et al. Using mortuary and burial data to place COVID-19 in Lusaka, Zambia within a global context. *Nat Commun*. 2023 Jun; 14(1):3840. <https://doi.org/10.1038/s41467-023-39288-6> PMID: 37380650
12. Mucheleng'anga LA, Himwaze CM. Re: Covid-19 deaths in Africa: prospective systematic postmortem surveillance study. *BMJ* [Internet]. 2021; Available from: <https://www.bmj.com/content/372/bmj.n334/rapid-responses>
13. World Health Organization (WHO). Medical certification of cause of death [Internet]. Geneva, Switzerland; 1979. Available from: <https://apps.who.int/iris/bitstream/handle/10665/40557/9241560622.pdf>

14. Kapombe P, Cheelo M, Kamalanga K, Tally L, Stoops E, Mwango C, et al. Most common causes of death in Zambia by HIV status, 2020–2021. In: *AIDS 2022*. Montreal, Canada; 2022.
15. Mapoma CC, Munkombwe B, Mwango C, Bwalya BB, Kalindi A, Gona NP. Application of verbal autopsy in routine civil registration in Lusaka District of Zambia. *BMC Health Serv Res*. 2021; 21(1):1–11.
16. Minchella PA, Chanda D, Hines JZ, Fwoloshi S, Itoh M, Kampamba D, et al. Clinical Characteristics and Outcomes of Patients Hospitalized With COVID-19 During the First 4 Waves in Zambia. *JAMA Network open*. 2022 Dec; 5(12):e2246152. <https://doi.org/10.1001/jamanetworkopen.2022.46152> PMID: 36512359
17. World Health Organization (WHO). Verbal autopsy standards: The 2016 WHO verbal autopsy instrument (v1.5.3) [Internet]. Geneva, Switzerland; 2016. Available from: <https://www.who.int/publications/m/item/verbal-autopsy-standards-the-2016-who-verbal-autopsy-instrument>
18. Byass P, Hussain-Alkhateeb L, D'Ambruoso L, Clark S, Davies J, Fottrell E, et al. An integrated approach to processing WHO-2016 verbal autopsy data: the InterVA-5 model. *BMC Med*. 2019 May; 17(1):102. <https://doi.org/10.1186/s12916-019-1333-6> PMID: 31146736
19. Zambia Ministry of Health. Implementation Strategy—Active Screening for COVID-19 in Health Facilities. Lusaka; 2020.
20. Zambia National Public Health Institute. Zambia COVID-19 Statistics; Daily Status Update [Internet]. Available from: <https://www.facebook.com/ZMPublicHealth/>
21. Ritchie H, Mathieu E, Rodés-Guirao L, Appel C, Giattino C, Ortiz-Ospina E, et al. Coronavirus Pandemic (COVID-19) [Internet]. Available from: <https://ourworldindata.org/coronavirus>
22. Fitzek A, Schädler J, Dietz E, Ron A, Gerling M, Kammal A, et al. Prospective postmortem evaluation of 735 consecutive SARS-CoV-2-associated death cases. *Sci Rep*. 2021; 11(1):19342. <https://doi.org/10.1038/s41598-021-98499-3> PMID: 34588486
23. Romanova ES, Vasilyev V V, Startseva G, Karev V, Rybakova MG, Platonov PG. Cause of death based on systematic post-mortem studies in patients with positive SARS-CoV-2 tissue PCR during the COVID-19 pandemic. *J Intern Med*. 2021 Sep; 290(3):655–65. <https://doi.org/10.1111/joim.13300> PMID: 33872433
24. Suzuki H, Muramatsu H, Hayashi K. Causes of death of forensic autopsy cases tested positive for COVID-19 in Tokyo Metropolis, Japan. *Leg Med (Tokyo)*. 2023 May; 62:102222. <https://doi.org/10.1016/j.legalmed.2023.102222> PMID: 36842226
25. World Health Organization (WHO). WHO Coronavirus (COVID-19) Dashboard [Internet]. [cited 2023 Aug 3]. Available from: <https://covid19.who.int/>
26. Fawole OI, Bello S, Adebawale AS, Bamgboye EA, Salawu MM, Afolabi RF, et al. COVID-19 surveillance in Democratic Republic of Congo, Nigeria, Senegal and Uganda: strengths, weaknesses and key Lessons. *BMC Public Health*. 2023 May; 23(1):835. <https://doi.org/10.1186/s12889-023-15708-6> PMID: 37158897
27. Stephen Longa Chanda Emmanuel Tembo, Sinyange Nyambe, Kayeyi Nkomba, Musonda Kunda, Chewe Orbie, et al. Characteristics of cases and deaths arising from SARS-CoV-2 infection in Zambia: March 2020 to April 2021. *Pan Afr Med J [Internet]*. 2023 [cited 2023 Aug 23]; 45. Available from: <https://doi.org/10.11604/pamj.2023.45.155.32018> PMID: 37869234
28. Africa Centres for Disease Control and Prevention. Continental framework on strengthening mortality surveillance systems in Africa [Internet]. Addis Ababa, Ethiopia; 2023. Available from: <https://africacdc.org/download/continental-framework-on-strengthening-mortality-surveillance-systems-in-africa/>
29. Smith-Sreen J, Miller B, Kabaghe AN, Kim E, Wadonda-Kabondo N, Frawley A, et al. Comparison of COVID-19 Pandemic Waves in 10 Countries in Southern Africa, 2020–2021. *Emerg Infect Dis*. 2022 Dec; 28(13):S93–104. <https://doi.org/10.3201/eid2813.220228> PMID: 36502398
30. Abou-Ismaïl MY, Diamond A, Kapoor S, Arafah Y, Nayak L. The hypercoagulable state in COVID-19: Incidence, pathophysiology, and management. *Thromb Res*. 2020 Oct; 194:101–15. <https://doi.org/10.1016/j.thromres.2020.06.029> PMID: 32788101
31. Menéndez C, Quintó L, Castillo P, Carrilho C, Ismaïl MR, Lorenzoni C, et al. Limitations to current methods to estimate cause of death: a validation study of a verbal autopsy model. *Gates open Res*. 2020; 4:55. <https://doi.org/10.12688/gatesopenres.13132.3> PMID: 33145479
32. Karat AS, Tlali M, Fielding KL, Charalambous S, Chihota VN, Churchyard GJ, et al. Measuring mortality due to HIV-associated tuberculosis among adults in South Africa: Comparing verbal autopsy, minimally-invasive autopsy, and research data. *PLoS One*. 2017; 12(3):e0174097. <https://doi.org/10.1371/journal.pone.0174097> PMID: 28334030

33. Duarte-Neto AN, Marinho M de F, Barroso LP, Saldiva de André CD, da Silva LFF, Dolhnikoff M, et al. Rapid Mortality Surveillance of COVID-19 Using Verbal Autopsy. *Int J Public Health*. 2021; 66:1604249. <https://doi.org/10.3389/ijph.2021.1604249> PMID: 34675760
34. Resolve to Save Lives. Estimating excess mortality from covid-19 [Internet]. 2020 [cited 2023 Aug 3]. Available from: <https://preventepidemics.org/covid19/resources/excess-mortality/>
35. World Health Organization (WHO). The true death toll of COVID-19; estimating global excess mortality [Internet]. [cited 2023 Aug 3]. Available from: <https://www.who.int/data/stories/the-true-death-toll-of-covid-19-estimating-global-excess-mortality>
36. Oduor C, Audi A, Kiplangat S, Auko J, Ouma A, Aoi G, et al. Estimating excess mortality during the COVID-19 pandemic from a population-based infectious disease surveillance in two diverse populations in Kenya, March 2020–December 2021. *PLOS Glob public Heal*. 2023; 3(8):e0002141. <https://doi.org/10.1371/journal.pgph.0002141> PMID: 37611028
37. Zou L, Ruan F, Huang M, Liang L, Huang H, Hong Z, et al. SARS-CoV-2 Viral Load in Upper Respiratory Specimens of Infected Patients. Vol. 382, *The New England journal of medicine*. United States; 2020. p. 1177–9. <https://doi.org/10.1056/NEJMc2001737> PMID: 32074444
38. Zhou F, Yu T, Du R, Fan G, Liu Y, Liu Z, et al. Clinical course and risk factors for mortality of adult inpatients with COVID-19 in Wuhan, China: a retrospective cohort study. *Lancet* (London, England). 2020 Mar; 395(10229):1054–62. [https://doi.org/10.1016/S0140-6736\(20\)30566-3](https://doi.org/10.1016/S0140-6736(20)30566-3) PMID: 32171076
39. World Health Organization Regional Office for Africa (WHO AFRO). Zambia's COVID-19 home-based care relieves health facilities [Internet]. 2020 [cited 2023 Aug 3]. Available from: <https://www.afro.who.int/countries/zambia/news/zambias-covid-19-home-based-care-relieves-health-facilities>
40. Duke Global Health Institute. 2023. [cited 2023 Aug 3]. Zambia becomes first to receive COVID medicines through Quick Start Consortium. Available from: <https://globalhealth.duke.edu/news/zambia-becomes-first-receive-covid-medicines-through-quick-start-consortium>
41. Sah P, Fitzpatrick MC, Zimmer CF, Abdollahi E, Juden-Kelly L, Moghadas SM, et al. Asymptomatic SARS-CoV-2 infection: A systematic review and meta-analysis. *Proc Natl Acad Sci U S A*. 2021 Aug; 118(34). <https://doi.org/10.1073/pnas.2109229118> PMID: 34376550
42. Akingba OL, Sprong K, Marais G, Hardie DR. Field performance evaluation of the PanBio rapid SARS-CoV-2 antigen assay in an epidemic driven by the B.1.351 variant in the Eastern Cape, South Africa. *J Clin Virol Plus* [Internet]. 2021; 1(1–2):100013. Available from: <https://doi.org/10.1016/j.jcvp.2021.100013>
43. Irungu JK, Munyua P, Ochieng C, Juma B, Amoth P, Kuria F, et al. Diagnostic accuracy of the Panbio COVID-19 antigen rapid test device for SARS-CoV-2 detection in Kenya, 2021: A field evaluation. *PLoS One*. 2023; 18(1):e0277657. <https://doi.org/10.1371/journal.pone.0277657> PMID: 36696882
44. Layfield LJ, Camp S, Bowers K, Miller DC. SARS-CoV-2 detection by reverse transcriptase polymerase chain reaction testing: Analysis of false positive results and recommendations for quality control measures. *Pathol Res Pract*. 2021 Sep; 225:153579. <https://doi.org/10.1016/j.prp.2021.153579> PMID: 34385110
45. Centers for Disease Control and Prevention (CDC). Collection and Submission of Postmortem Specimens from Deceased Persons with Confirmed or Suspected COVID-19 [Internet]. [cited 2023 Oct 25]. Available from: <https://www.cdc.gov/coronavirus/2019-ncov/hcp/guidance-postmortem-specimens.html>
46. Africa Centres for Disease Control and Prevention. The New Public Health Order: Africa's health security agenda [Internet]. 2023 [cited 2023 Aug 5]. Available from: <https://africacdc.org/news-item/the-new-public-health-order-africas-health-security-agenda/>
